# Supplementary material for: The lateral batting backlift technique: is it a contributing factor to success for professional cricket players at the highest level?
Source: PubMed Central journal article supplement (PMC9924531; doi:10.17159/2078-516x/2019/v31i1a5460), 2019-01-01
Supplement: 2078-516X-31-v31i1a5460-s001.pdf [file 2078-516X-31-v31i1a5460-s001.pdf]

**Supplementary Table 9: Characteristics and performances of the Free State cricket team (n = 3)**

| Player         | Mat | Inn | NO | Runs | First Class |         |             | List A     |         |             | Classifier | BBTT     |
|----------------|-----|-----|----|------|-------------|---------|-------------|------------|---------|-------------|------------|----------|
|                |     |     |    |      | High Score  | Average | Strike Rate | High Score | Average | Strike Rate |            |          |
| T. Ntuli       | 10  | 13  | 6  | 35   | <b>9</b>    | 5.0     | 31.2        | 4*         | -       | 77.7        | 1          | Straight |
| S. Arends      | 2   | 3   | 0  | 1    | <b>1</b>    | 0.3     | 6.6         | -          | -       | -           | 1          | Straight |
| J. L. du Plooy | 15  | 24  | 2  | 816  | <b>181</b>  | 37.0    | 51.9        | 85*        | 154.5   | 89.0        | 3          | Lateral  |

*BBTT = Batting Backlift Technique Type; Inn = Innings; Mat = Matches; NO = Not Outs; \* = Not out; - = did not play Tests/ODI; Highest scores = BOLD*

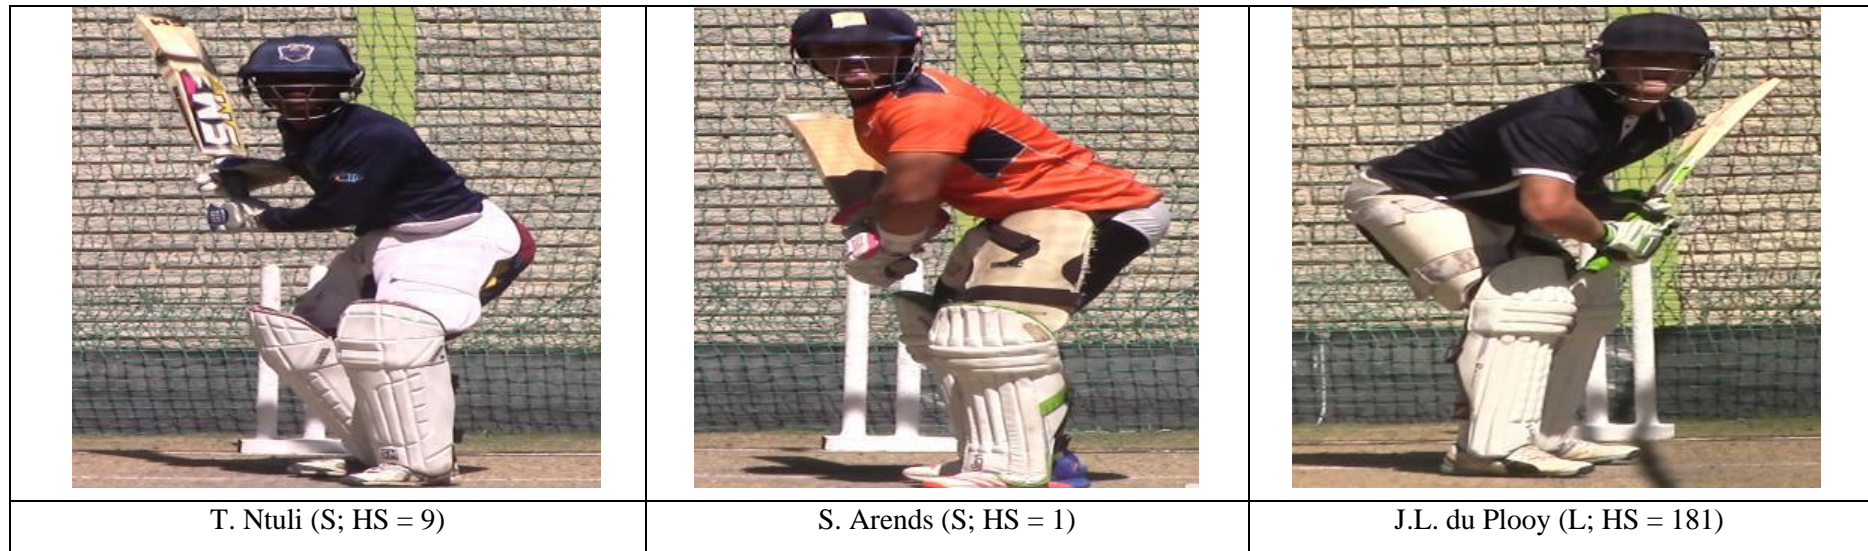

**Supplementary Figure 5.1: Batting backlift technique type of Free State cricket players (n = 3)**

*S = SBBT; L = LBBT; HS = Highest Score*

**Supplementary Table 10: Characteristics and performances of the Knights cricket team (n = 8)**

| Player           | Mat | Inn | NO | Runs | First Class |         |             | List A     |         |             | Classifier | BBTT     |
|------------------|-----|-----|----|------|-------------|---------|-------------|------------|---------|-------------|------------|----------|
|                  |     |     |    |      | High Score  | Average | Strike Rate | High Score | Average | Strike Rate |            |          |
| M. N. Erlank     | 88  | 142 | 13 | 3482 | <b>163*</b> | 26.9    | 43.0        | 72         | 22.6    | 73.3        | 3          | Lateral  |
| P. J. van Biljon | 72  | 121 | 14 | 4264 | <b>215*</b> | 39.8    | 52.5        | 134*       | 32.6    | 82.4        | 3          | Lateral  |
| R. R. Hendricks  | 105 | 185 | 12 | 5684 | 157         | 32.8    | 51.6        | <b>181</b> | 36.6    | 83.4        | 2          | Straight |
| L. L. L. Sesele  | 65  | 116 | 5  | 2414 | <b>177</b>  | 21.7    | 49.7        | 56         | 17.5    | 65.5        | 2          | Straight |
| P. Botha         | 71  | 109 | 17 | 3359 | <b>109*</b> | 36.5    | 59.7        | 76         | 23.3    | 83.4        | 3          | Lateral  |
| R.S. Second      | 70  | 118 | 9  | 4224 | <b>210</b>  | 38.7    | 48.4        | 135*       | 49.1    | 74.1        | 1          | Straight |
| W. L. Coetsee    | 118 | 198 | 23 | 5598 | <b>202*</b> | 31.9    | 57.9        | 130*       | 25.2    | 88.9        | 2          | Straight |
| T. M. Bodibe     | 121 | 214 | 16 | 5074 | <b>148</b>  | 25.6    | 47.6        | 88         | 19.4    | 62.8        | 3          | Lateral  |

*BBTT = Batting Backlift Technique Type; Inn = Innings; Mat = Matches; NO = Not Outs; \* = Not out; Highest scores = BOLD*

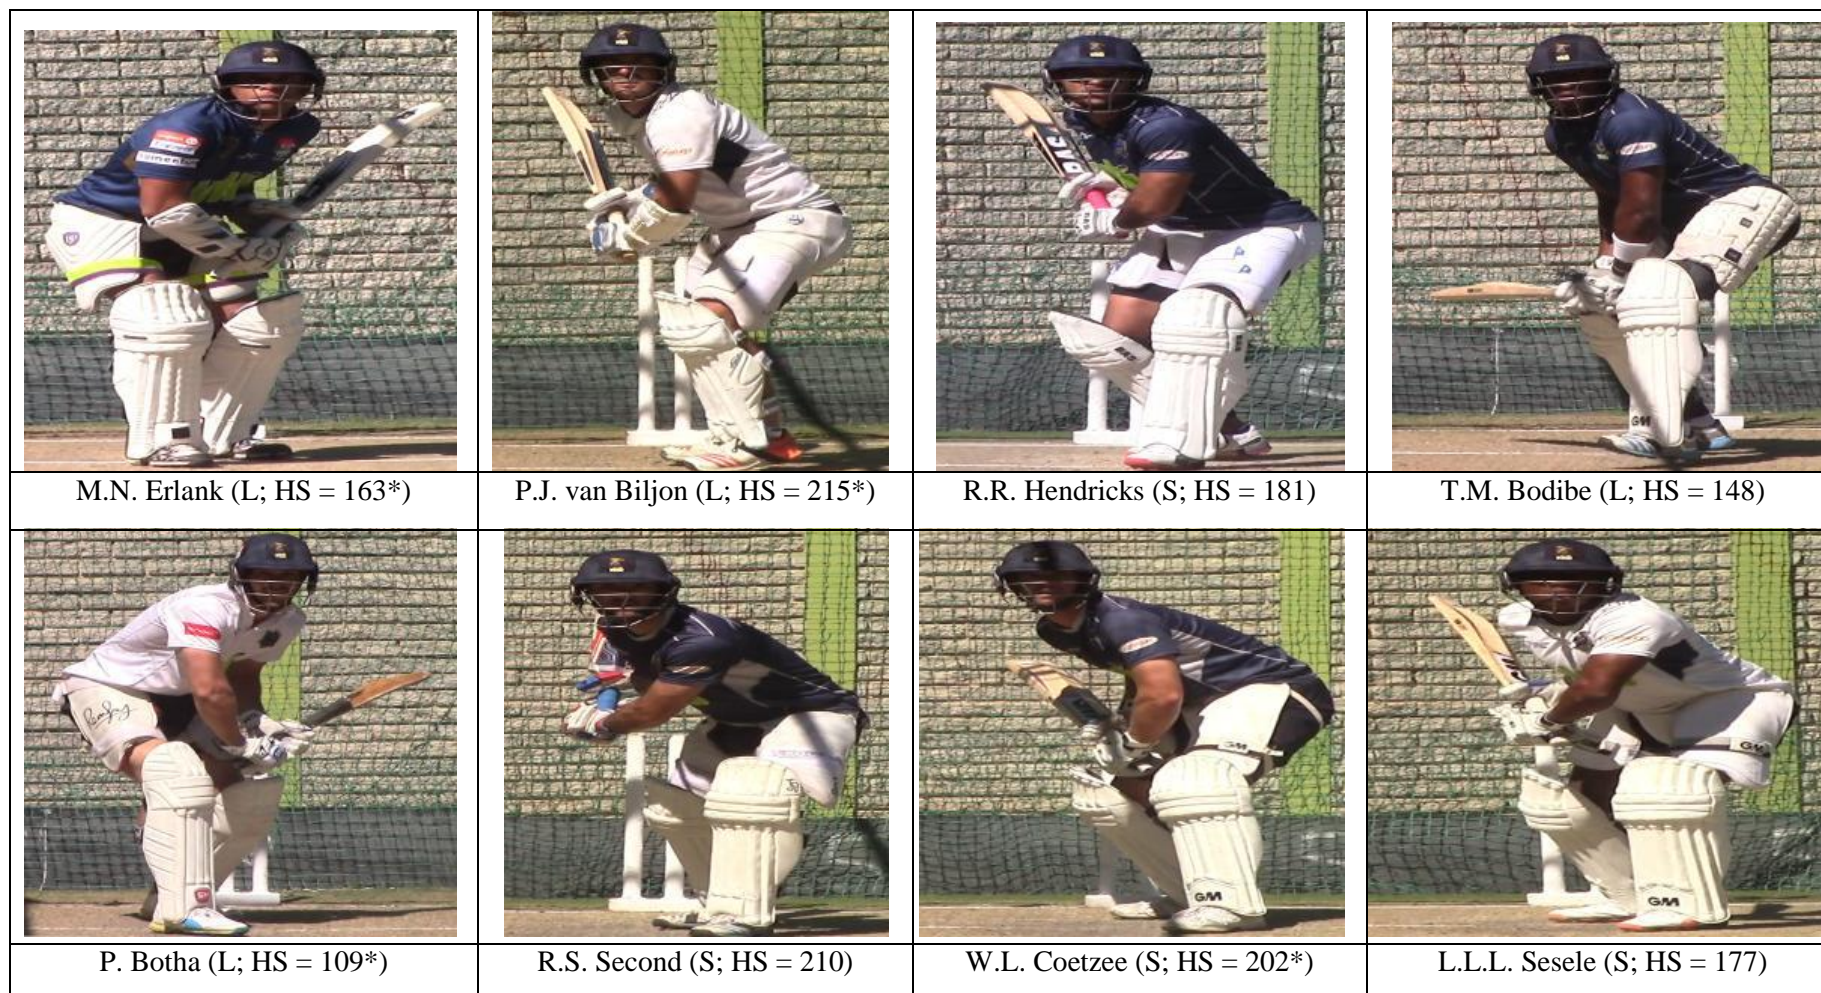

**Supplementary Figure 5.2: Batting backlift technique type of the Knights players (n = 8)**

*S = SBBT; L = LBBT; HS = Highest Score*

**Supplementary Table 11: Characteristics and performances of the Easterns cricket team (n = 10)**

| Player              | Mat | Inn | NO | Runs | First Class |         |             | List A     |         |             | Classifier | BBTT     |
|---------------------|-----|-----|----|------|-------------|---------|-------------|------------|---------|-------------|------------|----------|
|                     |     |     |    |      | High Score  | Average | Strike Rate | High Score | Average | Strike Rate |            |          |
| J. Snyman (L)       | 14  | 22  | 0  | 605  | <b>150</b>  | 27.5    | 59.3        | 121*       | 41.8    | 74.4        | 2          | Straight |
| D. Stanley (R)      | 53  | 74  | 31 | 496  | <b>55</b>   | 11.5    | 39.1        | 42         | 21.5    | 76.7        | 1          | Straight |
| K. Apea-Adu (R)     | 7   | 8   | 2  | 51   | <b>31</b>   | 8.5     | 35.6        | 5*         | -       | 66.6        | 1          | Straight |
| C.J. Dala (R)       | 35  | 39  | 15 | 313  | <b>79*</b>  | 13.0    | 40.3        | 20         | 11.4    | 77.4        | 1          | Straight |
| E. H. Kemm (L)      | 32  | 55  | 4  | 1829 | <b>136</b>  | 35.8    | 37.1        | 81         | 32.0    | 62.0        | 3          | Lateral  |
| W. B. Marshall (R)  | 17  | 31  | 0  | 860  | <b>103</b>  | 27.7    | 60.6        | 89         | 37.5    | 99.1        | 1          | Straight |
| T. A. Bula (R)      | 95  | 157 | 23 | 3909 | <b>106</b>  | 29.1    | 61.7        | 91         | 28.0    | 85.9        | 3          | Lateral  |
| W. Coulentianos (L) | 34  | 57  | 5  | 1867 | <b>171</b>  | 35.9    | 53.8        | 55         | 43.4    | 66.3        | 1          | Straight |
| E. R. Links (R)     | 50  | 72  | 16 | 1323 | <b>101*</b> | 23.6    | 52.2        | 42         | 16.7    | 64.4        | 3          | Lateral  |
| V. P. Moore (R)     | 27  | 37  | 10 | 385  | <b>48*</b>  | 14.2    | 32.9        | 18*        | 13.0    | 70.2        | 2          | Straight |

*BBTT = Batting Backlift Technique Type; Inn = Innings; Mat = Matches; NO = Not Outs; \* = Not out; - = did not play Tests/ODI; Highest scores = BOLD*

|                                                                                    |                                                                                    |                                                                                     |                                                                                      |                                                                                      |
|------------------------------------------------------------------------------------|------------------------------------------------------------------------------------|-------------------------------------------------------------------------------------|--------------------------------------------------------------------------------------|--------------------------------------------------------------------------------------|
|   |   |   |   |   |
| Snyman (S; HS = 150)                                                               | Stanley (S; HS = 55)                                                               | Apea-Adu (S; HS = 31)                                                               | Dala (S; HS = 79*)                                                                   | Kemmer (L; HS = 136)                                                                 |
|  |  |  |  |  |
| Marshall (S; HS = 103)                                                             | Bula (L; HS = 106)                                                                 | Coulentianos (S; HS = 171)                                                          | Links (L; HS = 101*)                                                                 | Moore (S; HS = 48*)                                                                  |

**Supplementary Figure 5.3: Batting backlift technique type of the Easterns players (n = 10)**

*S = SBBT; L = LBBT; HS = Highest Score*

Supplementary Table 12: Characteristics and performances of the Gauteng cricket team (n = 10)

| Player            | Mat | Inn | NO | Runs | First Class |         |             | List A     |         |             | Classifier | BBTT     |
|-------------------|-----|-----|----|------|-------------|---------|-------------|------------|---------|-------------|------------|----------|
|                   |     |     |    |      | High Score  | Average | Strike Rate | High Score | Average | Strike Rate |            |          |
| K. Mogotsi        | 10  | 18  | 2  | 358  | <b>69</b>   | 22.3    | 47.9        | 61         | 21.1    | 59.9        | 3          | Lateral  |
| Y. Valli          | 21  | 36  | 7  | 790  | <b>130*</b> | 27.2    | 41.1        | 31         | 17.8    | 54.3        | 3          | Lateral  |
| D. P. Conway      | 77  | 121 | 10 | 4189 | 142         | 37.7    | 54.9        | <b>152</b> | 44.1    | 82.7        | 3          | Lateral  |
| S. Pillay         | 28  | 45  | 9  | 1144 | <b>138*</b> | 31.7    | 44.3        | 81         | 30.2    | 69.9        | 1          | Straight |
| N.P. Mvelase      | 8   | 11  | 3  | 90   | 18          | 11.2    | 75.0        | <b>25</b>  | 15.0    | 95.2        | 2          | Straight |
| B. Dial           | 8   | 13  | 2  | 306  | <b>94*</b>  | 27.8    | 50.2        | 18         | 7.0     | 50.0        | 2          | Straight |
| S. Jamison        | 31  | 33  | 8  | 446  | <b>49</b>   | 17.8    | 58.3        | 15         | 11.6    | 62.5        | 2          | Straight |
| D. Potgieter      | 4   | 7   | 1  | 99   | 39          | 16.5    | 55.6        | <b>41</b>  | 36.5    | 85.8        | 2          | Straight |
| G. Roelofsen      | 1   | 1   | 0  | 4    | -           | -       | -           | <b>4</b>   | 4.0     | 100.0       | 2          | Straight |
| M. K. McGillivray | 27  | 39  | 8  | 557  | <b>69</b>   | 17.9    | 50.3        | 67         | 29.3    | 86.6        | 3          | Lateral  |

BBTT = Batting Backlift Technique Type; Inn = Innings; Mat = Matches; NO = Not Outs; \* = Not out; - = did not play Tests/ODI; Highest scores = BOLD

|                                                                                    |                                                                                    |                                                                                     |                                                                                      |                                                                                      |
|------------------------------------------------------------------------------------|------------------------------------------------------------------------------------|-------------------------------------------------------------------------------------|--------------------------------------------------------------------------------------|--------------------------------------------------------------------------------------|
|   |   |   |   |   |
| Mogotsi (L; HS = 69)                                                               | Valli (L; HS = 130*)                                                               | Conway (L; HS = 152)                                                                | Pillay (S; HS = 138*)                                                                | Mvelase (S; HS = 25)                                                                 |
|  |  |  |  |  |
| Dial (S; HS = 94*)                                                                 | Jamison (S; HS = 49)                                                               | Potgieter (S; HS = 41)                                                              | Roelofsen (S; HS = 4)                                                                | McGillivray (L; HS = 69)                                                             |

**Supplementary Figure 5.4: Batting backlift technique type of the Gauteng players (n = 10)**

*S = SBBT; L = LBBT; HS = Highest Score*

**Supplementary Table 13: Characteristics and performances of the North West cricket team (n = 4)**

| Player         | Mat | Inn | NO | Runs | First Class |         |             | List A     |         |             | Classifier | BBTT     |
|----------------|-----|-----|----|------|-------------|---------|-------------|------------|---------|-------------|------------|----------|
|                |     |     |    |      | High Score  | Average | Strike Rate | High Score | Average | Strike Rate |            |          |
| K. Rapulana    | 53  | 89  | 5  | 1930 | <b>112</b>  | 22.9    | 50.4        | 56         | 19.1    | 65.2        | 1          | Straight |
| M. J. Ackerman | 4   | 7   | 0  | 77   | 31          | 11.0    | 48.4        | <b>80</b>  | 31.5    | 86.3        | 2          | Straight |
| F.J. Lubbe     | 4   | 5   | 1  | 254  | <b>106</b>  | 63.5    | 51.5        | 14         | 7.6     | 92.0        | 3          | Lateral  |
| W.J. Lubbe     | 14  | 23  | 4  | 587  | <b>93</b>   | 30.8    | 60.3        | 78         | 30.6    | 72.6        | 3          | Lateral  |

*BBTT = Batting Backlift Technique Type; Inn = Innings; Mat = Matches; NO = Not Outs; \* = Not out; Highest scores = BOLD*



|                                                                                   |                                                                                    |                                                                                     |                                                                                     |
|-----------------------------------------------------------------------------------|------------------------------------------------------------------------------------|-------------------------------------------------------------------------------------|-------------------------------------------------------------------------------------|
|  |  |  |  |
| K. Rapulana (S; HS = 112)                                                         | M.J. Ackerman (S; HS = 80)                                                         | F.J. Lubbe (S; HS = 106)                                                            | W.J. Lubbe (S; HS = 93)                                                             |

**Supplementary Figure 5.5: Batting backlift technique type of the North West players (n = 4)**

*S = SBBT; L = LBBT; HS = Highest Score*

**Supplementary Table 14: Characteristics and performances of the Lions cricket players (n = 5)**

| Player               | Mat | Inn | NO | Runs  | First Class |         |             | List A     |         |             | Classifier | BBTT     |
|----------------------|-----|-----|----|-------|-------------|---------|-------------|------------|---------|-------------|------------|----------|
|                      |     |     |    |       | High Score  | Average | Strike Rate | High Score | Average | Strike Rate |            |          |
| S. C. Cook           | 171 | 315 | 28 | 11890 | <b>390</b>  | 41.4    | 48.7        | 127*       | 38.8    | 78.1        | 3          | Lateral  |
| H. E. van der Dussen | 83  | 137 | 14 | 5046  | <b>166</b>  | 41.0    | 46.2        | 134*       | 45.3    | 73.7        | 2          | Straight |
| A. N. Petersen       | 216 | 371 | 19 | 14062 | <b>286</b>  | 39.9    | 51.7        | 142*       | 36.2    | 82.6        | 1          | Straight |
| T. Bavuma            | 90  | 146 | 21 | 4900  | <b>162</b>  | 39.2    | 51.2        | 108*       | 26.7    | 80.0        | 1          | Straight |
| D. Pretorius         | 32  | 44  | 5  | 1510  | <b>177</b>  | 38.7    | 71.6        | 77*        | 41.0    | 98.4        | 2          | Straight |

*BBTT = Batting Backlift Technique Type; Inn = Innings; Mat = Matches; NO = Not Outs; \* = Not out; Highest scores = BOLD*

|                                                                                   |                                                                                   |                                                                                    |                                                                                     |                                                                                     |
|-----------------------------------------------------------------------------------|-----------------------------------------------------------------------------------|------------------------------------------------------------------------------------|-------------------------------------------------------------------------------------|-------------------------------------------------------------------------------------|
|  |  |  |  |  |
| Cook (L; HS = 390)                                                                | v.d. Dussen (S; HS = 166)                                                         | Petersen (S; HS = 286)                                                             | Bavuma (S; HS = 162)                                                                | Pretorius (S; HS = 177)                                                             |

**Supplementary Figure 5.6: Batting backlift technique type of the Lions players (n = 5)**

*S = SBBT; L = LBBT; HS = Highest Score*

**Supplementary Table 15: Characteristics and performances of the Northerns cricket team (n = 8)**

| Player           | Mat | Inn | NO | Runs | First Class |         |             | List A     |         |             | Classifier | BBTT     |
|------------------|-----|-----|----|------|-------------|---------|-------------|------------|---------|-------------|------------|----------|
|                  |     |     |    |      | High Score  | Average | Strike Rate | High Score | Average | Strike Rate |            |          |
| J.J. Pienaar     | 86  | 142 | 13 | 4008 | <b>185</b>  | 31.0    | 66.3        | 119        | 24.9    | 89.2        | 1          | Straight |
| V.B. Mahlangu    | 16  | 24  | 1  | 366  | <b>61</b>   | 15.9    | 46.0        | 16         | 10.0    | 48.7        | 2          | Straight |
| G. L. van Buuren | 54  | 82  | 14 | 3362 | <b>235</b>  | 49.4    | 66.3        | 119*       | 31.0    | 84.8        | 1          | Straight |
| A.K. Markram     | 20  | 32  | 2  | 1126 | <b>182</b>  | 37.5    | 59.9        | 111        | 35.6    | 88.0        | 3          | Lateral  |
| S. Naidoo        | 57  | 84  | 7  | 1893 | <b>119</b>  | 24.5    | 49.0        | 60         | 17.4    | 60.1        | 3          | Lateral  |
| H. Klaasen       | 42  | 63  | 12 | 2505 | <b>201</b>  | 49.1    | 70.0        | 70*        | 22.4    | 80.5        | 2          | Straight |
| S. von Berg      | 75  | 114 | 16 | 2738 | <b>105*</b> | 27.9    | 55.5        | 47*        | 14.0    | 79.8        | 3          | Lateral  |
| S.A. Mothoa      | 9   | 17  | 8  | 97   | <b>23*</b>  | 10.7    | 44.2        | -          | -       | -           | 2          | Straight |

*BBTT = Batting Backlift Technique Type; Inn = Innings; Mat = Matches; NO = Not Outs; \* = Not out; - = did not play Tests/ODI; Highest scores = BOLD*

|                                                                                    |                                                                                     |                                                                                      |                                                                                      |
|------------------------------------------------------------------------------------|-------------------------------------------------------------------------------------|--------------------------------------------------------------------------------------|--------------------------------------------------------------------------------------|
|   |   |   |   |
| J.J. Pienaar (S; HS = 185)                                                         | V.B. Mahlangu (S; HS = 61)                                                          | G.L. van Buuren (S; HS = 235)                                                        | S. von Berg (L; HS = )                                                               |
|  |  |  |  |
| A.K. Markram (L; HS = 182)                                                         | S. Naidoo (L; HS = 119)                                                             | H. Klaasen (S; HS = 201)                                                             | S.A. Mothoa (S; HS = 23*)                                                            |

**Supplementary Figure 5.7: Batting backlift technique type of the Northerns players (n = 8)**

*S = SBBT; L = LBBT; HS = Highest Score*

**Supplementary Table 16: Characteristics and performances of the Titans cricket team (n = 8)**

| Player         | Mat | Inn | NO | Runs | First Class |         |             | List A     |         |             | Classifier | BBTT     |
|----------------|-----|-----|----|------|-------------|---------|-------------|------------|---------|-------------|------------|----------|
|                |     |     |    |      | High Score  | Average | Strike Rate | High Score | Average | Strike Rate |            |          |
| H. G. Kuhn     | 121 | 211 | 21 | 8298 | <b>244*</b> | 43.6    | -           | 141*       | 30.8    | 85.1        | 3          | Lateral  |
| Q. de Kock     | 34  | 57  | 7  | 2404 | <b>194</b>  | 48.0    | 81.3        | 138*       | 40.0    | 93.5        | 3          | Lateral  |
| D. Elgar       | 126 | 217 | 21 | 8751 | <b>268</b>  | 44.6    | 49.9        | 117        | 39.5    | 77.1        | 1          | Straight |
| T. G. Mokoena  | 89  | 150 | 7  | 4224 | <b>217</b>  | 29.5    | 62.6        | 115*       | 17.4    | 75.3        | 2          | Straight |
| T. B. de Bruyn | 26  | 47  | 4  | 2009 | <b>202*</b> | 46.7    | 65.9        | 152*       | 36.3    | 81.6        | 3          | Lateral  |
| H. Davids      | 123 | 122 | 10 | 6658 | 158         | 31.4    | -           | <b>166</b> | 30.4    | 33.3        | 3          | Lateral  |
| M.Q. Adams     | 63  | 102 | 8  | 3773 | <b>167</b>  | 40.1    | 59.8        | 121*       | 38.9    | 95.7        | 2          | Straight |
| E. L. Hawken   | 21  | 23  | 1  | 252  | <b>54</b>   | 11.4    | 35.7        | 18         | 12.5    | 69.4        | 2          | Straight |

*BBTT = Batting Backlift Technique Type; Inn = Innings; Mat = Matches; NO = Not Outs; \* = Not out; - = did not play Tests/ODI; Highest scores = BOLD*

|                                                                                    |                                                                                     |                                                                                      |                                                                                      |
|------------------------------------------------------------------------------------|-------------------------------------------------------------------------------------|--------------------------------------------------------------------------------------|--------------------------------------------------------------------------------------|
|   |   |   |   |
| H.G. Kuhn (L; HS = 244*)                                                           | D. Elgar (S; HS = 268)                                                              | T.G. Mokoena (S; HS = 202*)                                                          | T.B. de Bruyn (L; HS = 217)                                                          |
|  |  |  |  |
| H. Davids (L; HS = 166)                                                            | M.Q. Adams (S; HS = 167)                                                            | Q. de Kock (L; HS = 194)                                                             | E.L. Hawken (S; HS = 54)                                                             |

**Supplementary Figure 5.8: Batting backlift technique type of the Titans players (n = 8)**

*S = SBBT; L = LBBT; HS = Highest Score*

Supplementary Table 17: Characteristics and performances of the Kwa-Zulu Natal Inland cricket team (n = 7)

| Player       | Mat | Inn | NO | Runs | First Class |         |             | List A     |         |             | Classifier | BBTT     |
|--------------|-----|-----|----|------|-------------|---------|-------------|------------|---------|-------------|------------|----------|
|              |     |     |    |      | High Score  | Average | Strike Rate | High Score | Average | Strike Rate |            |          |
| D.J. van Wyk | 124 | 212 | 8  | 8048 | <b>178</b>  | 39.4    | 53.9        | 118        | 34.0    | 79.5        | 1          | Straight |
| K. Nipper    | 77  | 125 | 19 | 3677 | <b>151*</b> | 34.6    | 60.1        | 100*       | 27.9    | 85.6        | 3          | Lateral  |
| R. Pretorius | 37  | 61  | 6  | 1319 | 66*         | 23.9    | 58.1        | <b>71</b>  | 34.5    | 93.8        | 2          | Straight |
| G. Dukes     | 12  | 24  | 3  | 415  | <b>54</b>   | 19.7    | 58.0        | 47*        | 27.0    | 79.4        | 3          | Lateral  |
| L. Mosena    | 73  | 118 | 4  | 2612 | <b>105</b>  | 22.9    | 48.2        | 73         | 23.3    | 60.4        | 3          | Lateral  |
| K. R. Kishun | 18  | 23  | 6  | 368  | <b>96</b>   | 21.6    | 38.4        | 37         | 12.1    | 59.5        | 1          | Straight |
| G. Hume      | 68  | 89  | 23 | 1266 | <b>105</b>  | 19.1    | 45.9        | 30         | 17.9    | 60.4        | 1          | Straight |

BBTT = Batting Backlift Technique Type; Inn = Innings; Mat = Matches; NO = Not Outs; \* = Not out; Highest scores = BOLD



|                                                                                    |                                                                                     |                                                                                      |                                                                                     |
|------------------------------------------------------------------------------------|-------------------------------------------------------------------------------------|--------------------------------------------------------------------------------------|-------------------------------------------------------------------------------------|
|   |   |   |  |
| D.J. van Wyk (S; HS = 178)                                                         | K. Nipper (L; HS = 151*)                                                            | R. Pretorius (S; HS = 66*)                                                           | K.R. Kishun (S; HS = 96)                                                            |
|  |  |  |                                                                                     |
| G. Dukes (L; HS = 54)                                                              | G. Hume (S; HS = 105)                                                               | L. Mosena (L; HS = 105)                                                              |                                                                                     |

**Supplementary Figure 5.9: Batting backlift technique type of the Kwa-Zulu Natal Inland players (n = 7)**

**Supplementary Table 18: Characteristics and performances of the Dolphins cricket team (n = 10)**

| Player              | Mat | Inn | NO | Runs | First Class |         |             | List A     |         |             | Classifier | BBTT     |
|---------------------|-----|-----|----|------|-------------|---------|-------------|------------|---------|-------------|------------|----------|
|                     |     |     |    |      | High Score  | Average | Strike Rate | High Score | Average | Strike Rate |            |          |
| K. Zondo            | 81  | 128 | 3  | 3503 | <b>175</b>  | 28.0    | 48.0        | 110        | 28.6    | 75.5        | 1          | Straight |
| V. B. van Jaarsveld | 92  | 152 | 6  | 5698 | <b>160</b>  | 39.0    | 63.0        | 118        | 37.2    | 86.6        | 3          | Lateral  |
| J. D. Vandiar       | 72  | 118 | 9  | 3598 | <b>172*</b> | 36.3    | 59.7        | 130        | 31.2    | 87.3        | 3          | Lateral  |
| D. Smit             | 116 | 172 | 31 | 5086 | <b>156*</b> | 36.0    | 46.8        | 109        | 31.6    | 76.8        | 3          | Lateral  |
| C. Alexander        | 90  | 103 | 39 | 802  | <b>54</b>   | 12.5    | 66.0        | 31*        | 5.3     | 63.5        | 1          | Straight |
| S. Erwee            | 55  | 93  | 10 | 2958 | <b>200*</b> | 35.6    | 54.0        | 113        | 41.0    | 87.5        | 1          | Straight |
| M. van Wyk          | 146 | 251 | 37 | 8318 | <b>200*</b> | 38.8    | 68.8        | 175*       | 40.4    | 143.3       | 3          | Lateral  |
| K.A. Maharaj        | 74  | 100 | 19 | 1799 | <b>114*</b> | 22.2    | 66.2        | 43*        | 13.1    | 87.1        | 3          | Lateral  |
| M. Shezi            | 72  | 86  | 29 | 546  | <b>64</b>   | 9.5     | 27.4        | 16         | 6.6     | 43.5        | 1          | Straight |
| D. M. Dupavillon    | 40  | 45  | 14 | 392  | <b>44</b>   | 12.6    | 62.0        | 11         | 12.0    | 85.7        | 1          | Straight |

*BBTT = Batting Backlift Technique Type; Inn = Innings; Mat = Matches; NO = Not Outs; \* = Not out; Highest scores = BOLD*

|                                                                                    |                                                                                    |                                                                                     |                                                                                      |                                                                                      |
|------------------------------------------------------------------------------------|------------------------------------------------------------------------------------|-------------------------------------------------------------------------------------|--------------------------------------------------------------------------------------|--------------------------------------------------------------------------------------|
|   |   |   |   |   |
| K. Zondo (S; HS = 175)                                                             | van Jaarsveld (L; HS = 160)                                                        | Vandiar (L; HS = 172*)                                                              | D. Smit (L; HS = 156*)                                                               | C. Alexander (S; HS = 54)                                                            |
|  |  |  |  |  |
| S. Erwee (S; HS = 200*)                                                            | M. van Wyk (L; HS = 200*)                                                          | Maharaj (L; HS = 114*)                                                              | M. Shezi (S; HS = 64)                                                                | Dupavillon (S; HS = 44)                                                              |

**Supplementary Figure 5.10: Batting backlift technique type of the Dolphins players (n = 10)**

*S = SBBT; L = LBBT; HS = Highest Score*

**Supplementary Table 19: Characteristics and performances of the Border cricket team (n = 7)**

| Player         | Mat | Inn | NO | Runs | First Class |         |             | List A     |         |             | Classifier | BBTT     |
|----------------|-----|-----|----|------|-------------|---------|-------------|------------|---------|-------------|------------|----------|
|                |     |     |    |      | High Score  | Average | Strike Rate | High Score | Average | Strike Rate |            |          |
| G.V.J. Koopman | 48  | 84  | 4  | 1981 | <b>108</b>  | 24.7    | 44.0        | 87*        | 32.1    | 69.6        | 3          | Lateral  |
| S. Seyibokwe   | 50  | 84  | 3  | 2133 | <b>101</b>  | 26.3    | 55.0        | 33         | 11.9    | 67.2        | 1          | Straight |
| M. Malika      | 1   | 1   | 0  | 7    | -           | -       | -           | 7          | 7.0     | 87.5        | 1          | Straight |
| D.L. Brown     | 97  | 153 | 20 | 3480 | <b>112*</b> | 26.1    | 48.5        | 76         | 34.9    | 90.7        | 2          | Straight |
| J. Marais      | 1   | 2   | 0  | 30   | <b>18</b>   | 15.0    | 43.4        | 9          | 5.2     | 47.8        | 2          | Straight |
| M. Walters     | 57  | 96  | 7  | 2757 | <b>180*</b> | 30.9    | 48.2        | 102*       | 34.9    | 67.5        | 3          | Lateral  |
| C.G. Bosch     | 2   | 3   | 0  | 20   | 13          | 6.6     | 28.5        | <b>14</b>  | 9.5     | 52.7        | 3          | Lateral  |

*BBTT = Batting Backlift Technique Type; Inn = Innings; Mat = Matches; NO = Not Outs; \* = Not out; - = did not play Tests/ODI; Highest scores = BOLD*

|                                                                                    |                                                                                     |                                                                                      |                                                                                     |
|------------------------------------------------------------------------------------|-------------------------------------------------------------------------------------|--------------------------------------------------------------------------------------|-------------------------------------------------------------------------------------|
|   |   |   |  |
| G.V.J. Koopman (L; HS = 108)                                                       | S. Seyibokwe (S; HS = 101)                                                          | M. Malika (S; HS = )                                                                 | D.L. Brown (S; HS = 112*)                                                           |
|  |  |  |                                                                                     |
| J. Marais (S; HS = 18)                                                             | M. Walters (L; HS = 180*)                                                           | C. G. Bosch (L; HS = 14)                                                             |                                                                                     |

**Supplementary Figure 5.11: Batting backlift technique type of the Border players (n = 7)**

*S = SBBT; L = LBBT; HS = Highest Score*

Supplementary Table 20: Characteristics and performances of the Eastern Province cricket team (n = 10)

| Player           | Mat | Inn | NO | Runs | First Class |         |             | List A     |         |             | Classifier | BBTT     |
|------------------|-----|-----|----|------|-------------|---------|-------------|------------|---------|-------------|------------|----------|
|                  |     |     |    |      | High Score  | Average | Strike Rate | High Score | Average | Strike Rate |            |          |
| D.J. White       | 70  | 120 | 8  | 3528 | <b>160</b>  | 31.5    | 49.3        | 94*        | 29.6    | 73.6        | 3          | Lateral  |
| E.M. Moore       | 36  | 63  | 8  | 1936 | <b>144</b>  | 35.2    | 50.8        | 90         | 38.0    | 75.2        | 3          | Lateral  |
| M.C. Christensen | 8   | 9   | 0  | 209  | <b>84</b>   | 23.2    | 39.9        | 27         | 15.3    | 112.1       | 2          | Straight |
| K.R. Smuts       | 74  | 123 | 8  | 3484 | <b>148</b>  | 30.2    | 55.7        | 90         | 21.2    | 82.7        | 2          | Straight |
| A.J.N. Price     | 46  | 71  | 5  | 2235 | <b>167</b>  | 33.8    | 68.2        | 87         | 33.6    | 86.1        | 3          | Lateral  |
| O. Nyaku         | 12  | 16  | 1  | 342  | <b>93*</b>  | 22.8    | 43.1        | 30         | 13.5    | 79.4        | 3          | Lateral  |
| A. Nortje        | 19  | 22  | 8  | 321  | <b>79*</b>  | 22.9    | 55.9        | 16         | 10.0    | 55.5        | 3          | Lateral  |
| T. Bokako        | 24  | 31  | 2  | 284  | <b>31</b>   | 9.7     | 39.7        | 28         | 13.3    | 56.3        | 1          | Straight |
| E. O'Reilly      | 32  | 34  | 16 | 229  | <b>42*</b>  | 12.7    | 31.9        | 6*         | 4.8     | 45.2        | 2          | Straight |
| T. Koekemoer     | 1   | 1   | 0  | 46   | <b>46</b>   | 46.0    | 48.9        | 9          | 19.0    | 86.3        | 3          | Lateral  |

BBTT = Batting Backlift Technique Type; Inn = Innings; Mat = Matches; NO = Not Outs; \* = Not out; Highest scores = BOLD

|                                                                                    |                                                                                    |                                                                                     |                                                                                      |                                                                                      |
|------------------------------------------------------------------------------------|------------------------------------------------------------------------------------|-------------------------------------------------------------------------------------|--------------------------------------------------------------------------------------|--------------------------------------------------------------------------------------|
|   |   |   |   |   |
| White (L; HS = 160)                                                                | Moore (L; HS = 144)                                                                | Christensen (S; HS = 84)                                                            | Smuts (S; HS = 148)                                                                  | Price (L; HS = 167)                                                                  |
|  |  |  |  |  |
| Nyaku (L; HS = 93*)                                                                | Nortje (L; HS = 79*)                                                               | Bokako (S; HS = 31)                                                                 | O'Reilly (S; HS = 42*)                                                               | Koekemoer (L; HS = 46)                                                               |

**Supplementary Figure 5.12: Batting backlift technique type of the Eastern Province players (n = 10)**

*S = SBBT; L = LBBT; HS = Highest Score*

**Supplementary Table 21: Characteristics and performances of the Warriors cricket team (n = 10)**

| Player         | Mat | Inn | NO | Runs | First Class |         |             | List A     |         |             | Classifier | BBTT     |
|----------------|-----|-----|----|------|-------------|---------|-------------|------------|---------|-------------|------------|----------|
|                |     |     |    |      | High Score  | Average | Strike Rate | High Score | Average | Strike Rate |            |          |
| C.N. Ackermann | 61  | 107 | 11 | 3680 | <b>144</b>  | 38.3    | 46.3        | 92         | 32.1    | 68.1        | 3          | Lateral  |
| G.L. Cloete    | 80  | 138 | 9  | 3874 | <b>135</b>  | 30.0    | 49.1        | 85         | 22.7    | 65.8        | 2          | Straight |
| M.L. Price     | 98  | 181 | 9  | 5366 | <b>181</b>  | 31.1    | 51.9        | 155        | 39.7    | 77.6        | 2          | Straight |
| J.J.T. Smuts   | 76  | 142 | 8  | 4386 | <b>150*</b> | 32.7    | 61.2        | 132        | 33.8    | 77.9        | 3          | Lateral  |
| M.Y. Vallie    | 76  | 118 | 13 | 4211 | <b>167</b>  | 40.1    | 58.9        | 96         | 33.0    | 77.5        | 1          | Straight |
| M.J. Ngolo     | 47  | 72  | 4  | 1525 | <b>137</b>  | 22.4    | 53.8        | 63         | 23.1    | 76.1        | 3          | Lateral  |
| C. Fortuin     | 18  | 26  | 2  | 600  | 72          | 25.0    | 51.0        | <b>80</b>  | 15.0    | 68.2        | 1          | Straight |
| S.R. Harmer    | 76  | 118 | 25 | 2450 | <b>100*</b> | 26.3    | 48.7        | 43*        | 19.3    | 101.4       | 1          | Straight |
| A. Gqamane     | 46  | 65  | 10 | 1074 | 86          | 19.5    | 77.7        | <b>88*</b> | 32.6    | 112.7       | 1          | Straight |
| S.S.B. Magala  | 56  | 80  | 18 | 1053 | 53          | 16.9    | 47.6        | <b>78*</b> | 15.3    | 87.9        | 3          | Lateral  |

*BBTT = Batting Backlift Technique Type; Inn = Innings; Mat = Matches; NO = Not Outs; \* = Not out; Highest scores = BOLD*



|                                                                                    |                                                                                    |                                                                                     |                                                                                      |                                                                                      |
|------------------------------------------------------------------------------------|------------------------------------------------------------------------------------|-------------------------------------------------------------------------------------|--------------------------------------------------------------------------------------|--------------------------------------------------------------------------------------|
|   |   |   |   |   |
| Ackermann (L; HS = 144)                                                            | Cloete (S; HS = 135)                                                               | Price (S; HS = 181)                                                                 | Fortuin (S; HS = 72)                                                                 | Harmer (S; HS = 100*)                                                                |
|  |  |  |  |  |
| Smuts (L; HS = 150*)                                                               | Vallie (S; HS = 167)                                                               | Nqolo (L; HS = 137)                                                                 | Gqamane (S; HS = 86)                                                                 | Magala (L; HS = 53)                                                                  |

**Supplementary Figure 5.13: Batting backlift technique type of the Warriors players (n = 10)**

*S = SBBT; L = LBBT; HS = Highest Score*

**Supplementary Table 22: Characteristics and performances of the Cobras cricket team (n = 8)**

| Player       | Mat | Inn | NO | Runs  | First Class |         |             | List A      |         |             | Classifier | BBTT     |
|--------------|-----|-----|----|-------|-------------|---------|-------------|-------------|---------|-------------|------------|----------|
|              |     |     |    |       | High Score  | Average | Strike Rate | High Score  | Average | Strike Rate |            |          |
| A.G. Puttick | 158 | 274 | 27 | 10057 | <b>250*</b> | 40.7    | -           | 143         | 36.3    | -           | 1          | Straight |
| O.A. Ramela  | 86  | 150 | 7  | 4183  | <b>202*</b> | 29.2    | 42.0        | 106         | 28.0    | 64.6        | 1          | Straight |
| S. van Zyl   | 11  | 15  | 2  | 355   | 101*        | 27.3    | 53.9        | <b>114*</b> | 37.0    | 73.9        | 2          | Straight |
| J.L. Ontong  | 181 | 288 | 22 | 10901 | <b>166</b>  | 40.9    | 36.7        | 122         | 29.4    | 68.9        | 2          | Straight |
| D.J. Vilas   | 88  | 132 | 14 | 4845  | <b>216*</b> | 68.6    | 44.7        | 120         | 33.0    | 95.5        | 1          | Straight |
| C. Tshiki    | 27  | 46  | 1  | 928   | <b>175</b>  | 20.6    | 43.4        | 98          | 22.8    | 65.5        | 2          | Straight |
| W.D. Parnell | 56  | 75  | 6  | 1747  | 111*        | 25.3    | 51.5        | <b>129</b>  | 24.5    | 85.4        | 3          | Lateral  |
| V. Philander | 123 | 161 | 28 | 3388  | <b>168</b>  | 25.4    | 46.4        | 79*         | 23.2    | 75.2        | 3          | Lateral  |

*BBTT = Batting Backlift Technique Type; Inn = Innings; Mat = Matches; NO = Not Outs; \* = Not out; - = did not play Tests/ODI; Highest scores = BOLD*

|                                                                                    |                                                                                     |                                                                                      |                                                                                      |
|------------------------------------------------------------------------------------|-------------------------------------------------------------------------------------|--------------------------------------------------------------------------------------|--------------------------------------------------------------------------------------|
|   |   |   |   |
| A.G. Puttick (S; HS = 250*)                                                        | O.A. Ramela (S; HS = 202*)                                                          | S. van Zyl (S; HS = 114)                                                             | J.L. Ontong (S; HS = 166)                                                            |
|  |  |  |  |
| C. Tshiki (S; HS = 175)                                                            | W.D. Parnell (L; HS = 129)                                                          | V. Philander (L; HS = 168)                                                           | D.J. Vilas (S; HS = 216*)                                                            |

**Supplementary Figure 5.14: Batting backlift technique type of the Cobras players (n = 8)**

*S = SBBT; L = LBBT; HS = Highest Score*

**Supplementary Table 23: Characteristics and performances of the Western Province players (n =10)**

*Note: Players from this group provided consent for participation in the study but not for their identity to be disclosed.*

| Amateur Players | BBTT           | Classifier | First Class |             | List A |             |
|-----------------|----------------|------------|-------------|-------------|--------|-------------|
|                 |                |            | Runs        | Average     | Runs   | Average     |
| Player 1        | Straight       | 1          | 76          | 7.6         | 15     | 15.0        |
| Player 2        | <b>Lateral</b> | 3          | 5873        | <b>41.3</b> | 2152   | <b>48.9</b> |
| Player 3        | Straight       | 2          | 1927        | 27.5        | 487    | 18.7        |
| Player 4        | <b>Lateral</b> | 3          | 570         | <b>51.8</b> | 103    | <b>34.3</b> |
| Player 5        | Straight       | 2          | 3000        | 34.0        | 376    | 17.0        |
| Player 6        | Straight       | 1          | 802         | 22.9        | 171    | 11.4        |
| Player 7        | Straight       | 2          | 117         | 23.4        | 6      | 3.0         |
| Player 8        | Straight       | 1          | 73          | 7.3         | 46     | 46.0        |
| Player 9        | Straight       | 2          | 90          | 12.8        | 13     | 13.0        |
| Player 10       | Straight       | 2          | 167         | 12.8        | 114    | 16.2        |

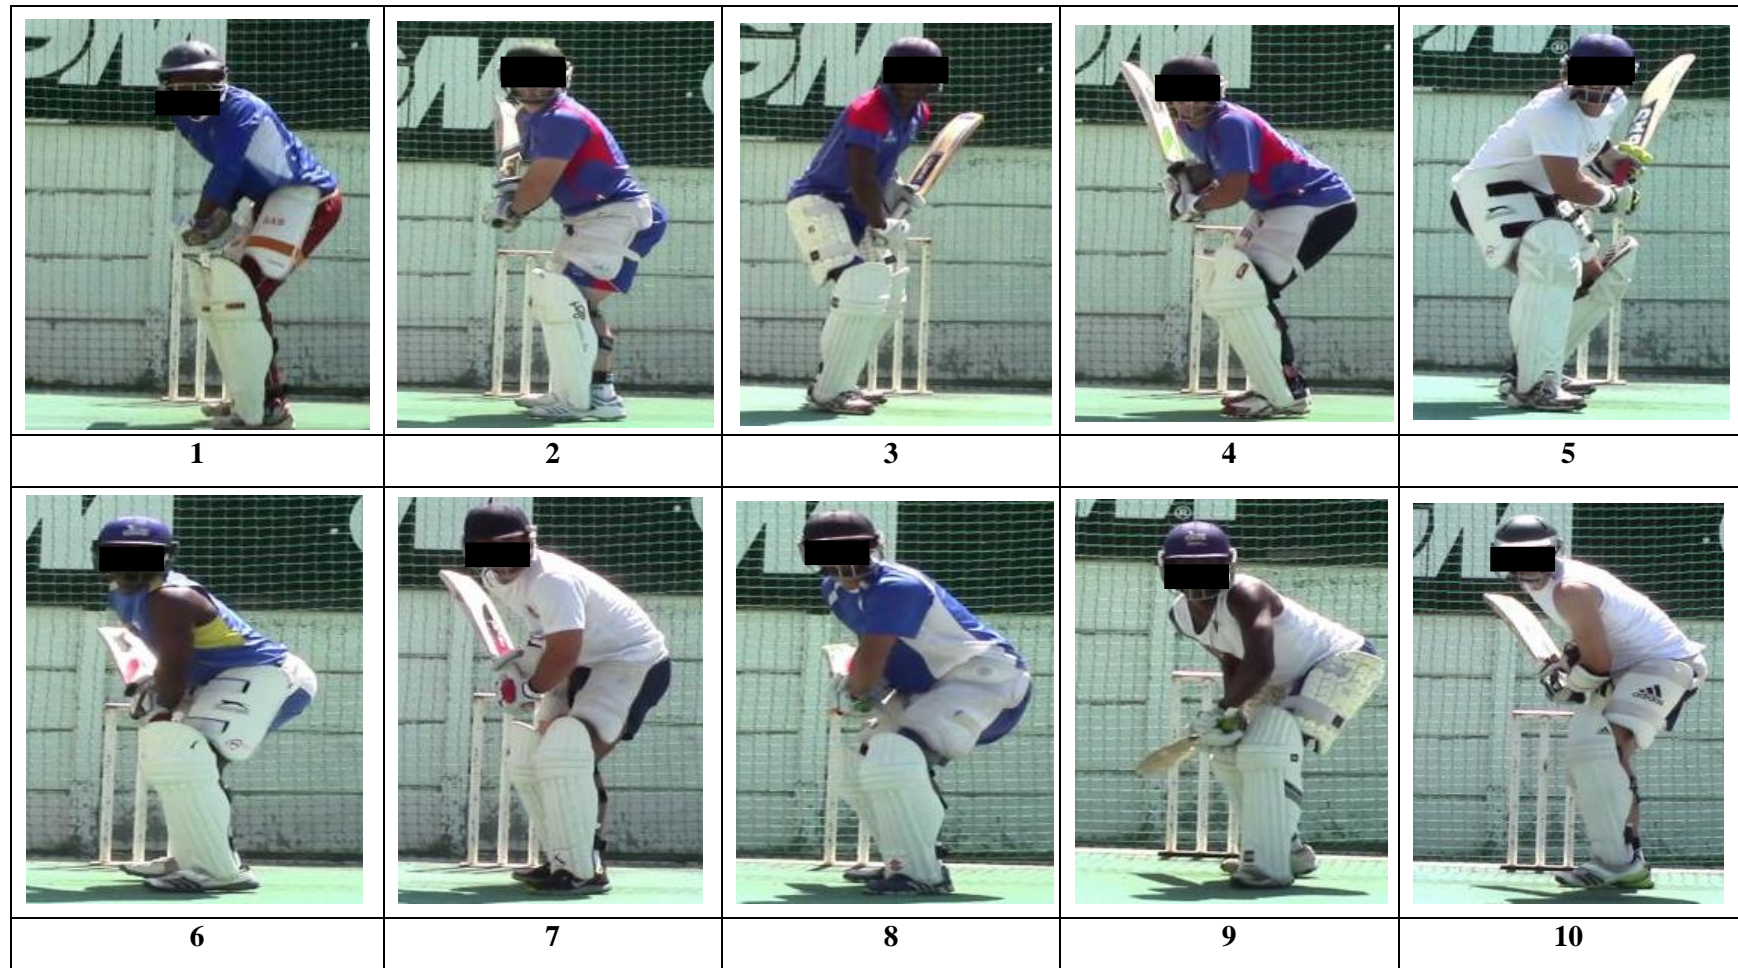

**Supplementary Figure 5.15: Batting backlift technique type of the Western Province players (n = 10)**

*Note: This team provided consent to participate in the study but not for their identity to be disclosed.*

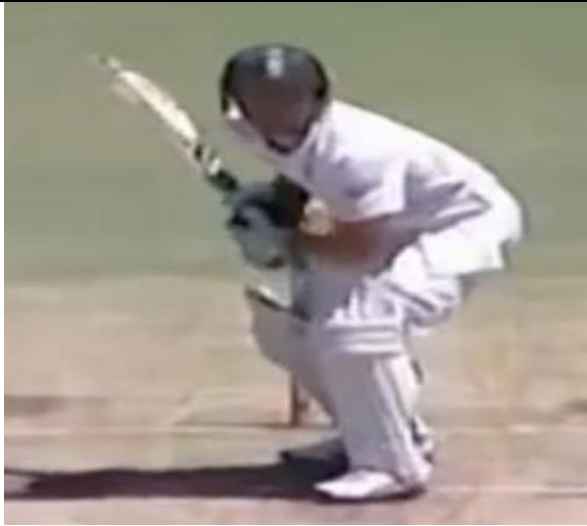

AB de Villiers (L; HS = 278\*)

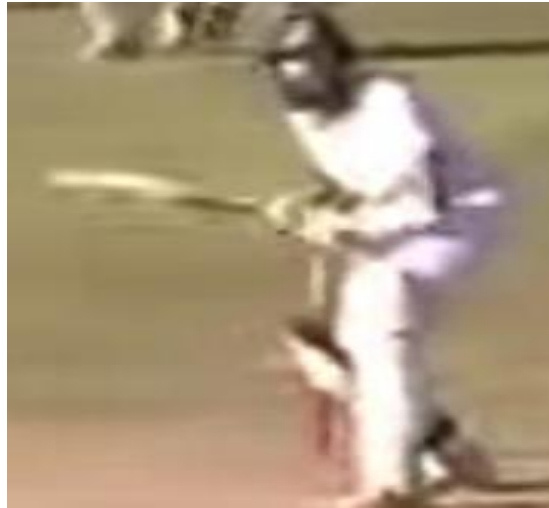

Hashim Amla (L; HS = 311\*)

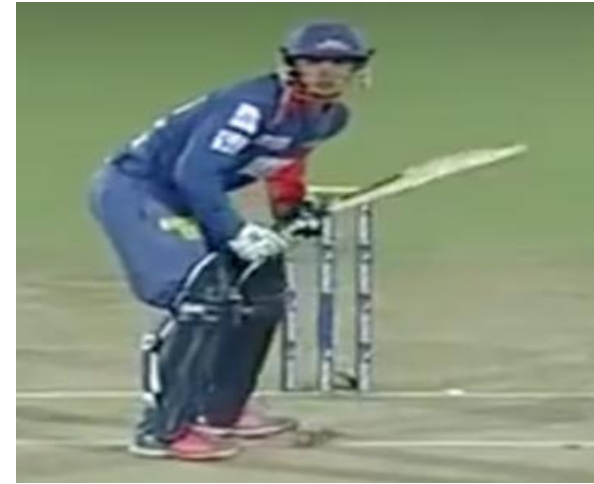

Quinton de Kock (L; HS = 129)

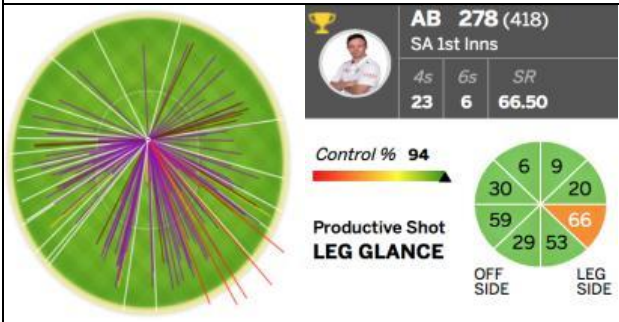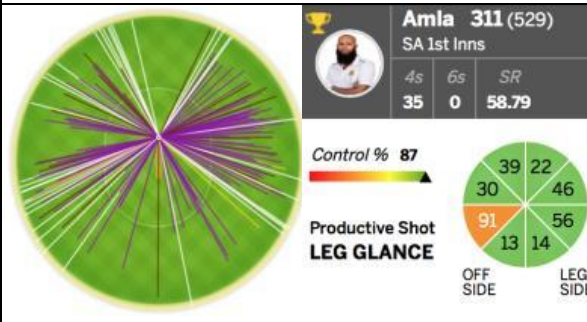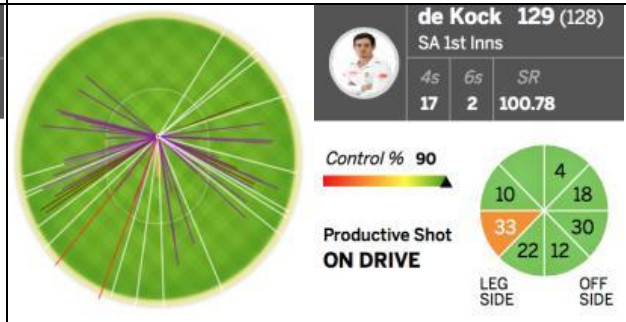

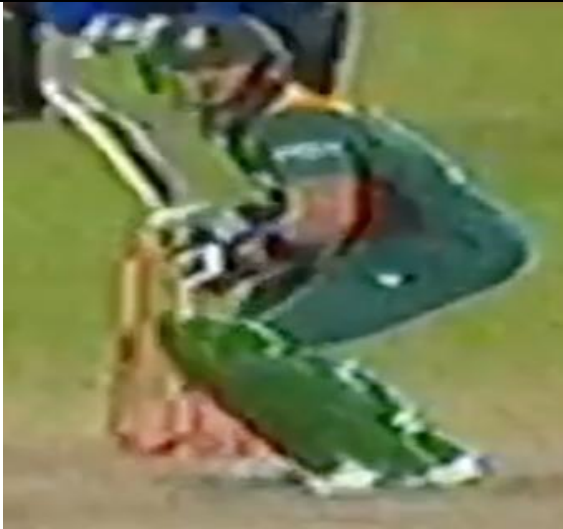

Faf du Plessis (L; HS = 137)

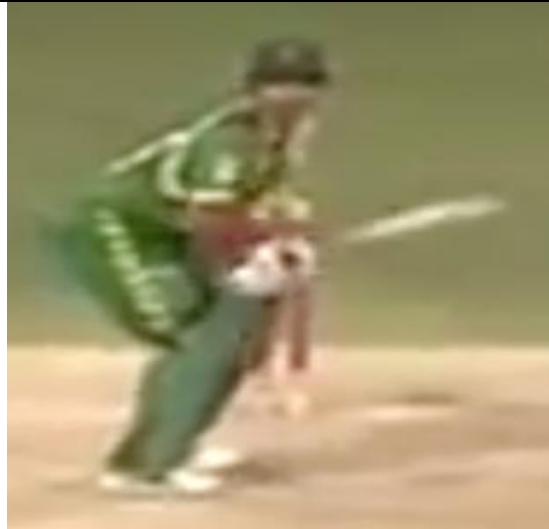

JP Duminy (L; HS = 166)

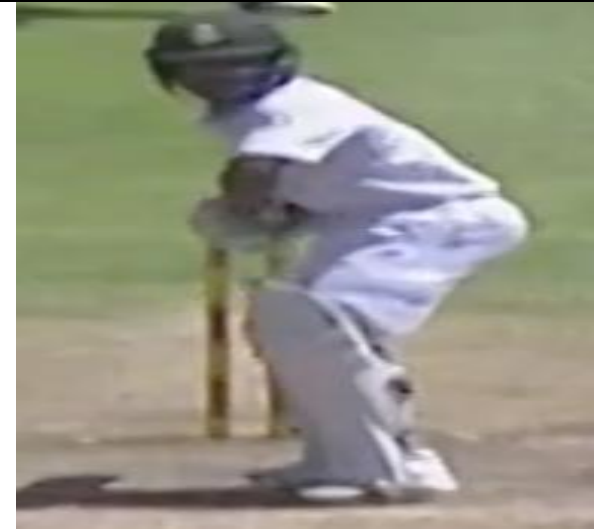

Temba Bavuma (S; HS = 102)

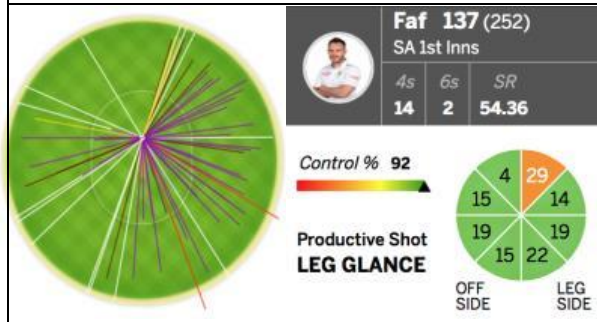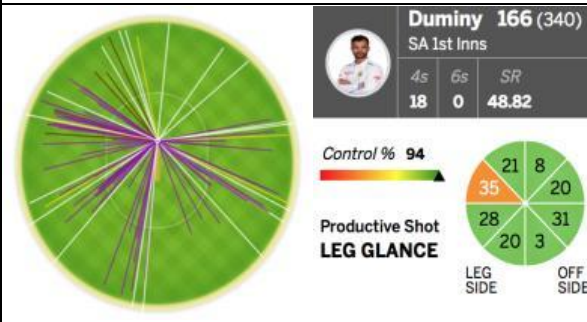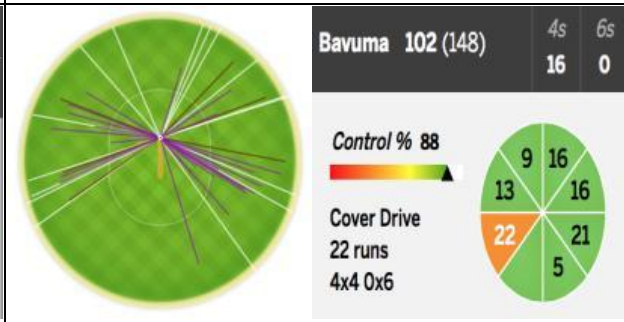

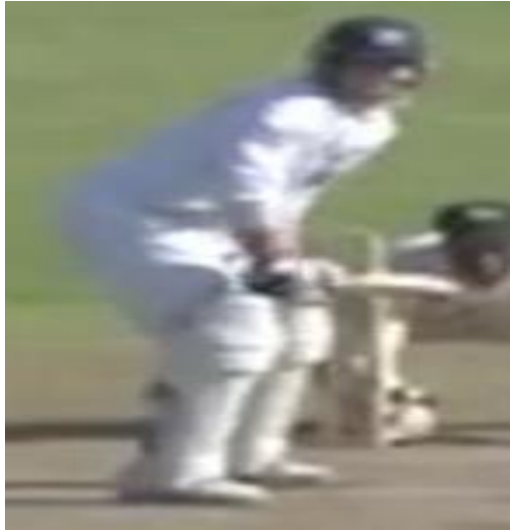

Stiaan van Zyl (S; HS = 101)

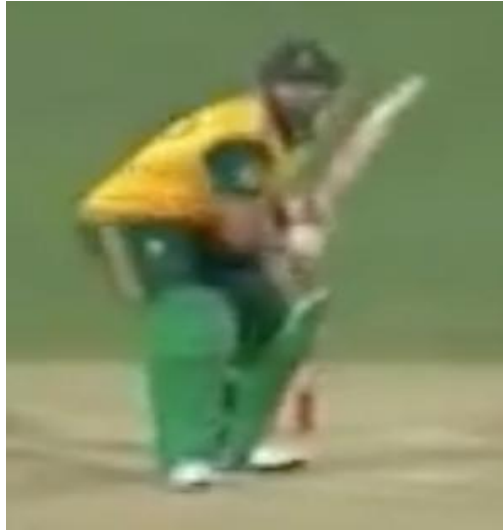

Rilee Rossouw (L; HS = 132)

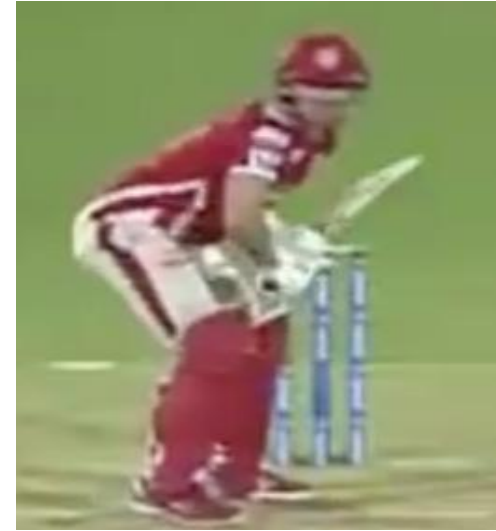

David Miller (L; HS = 138)

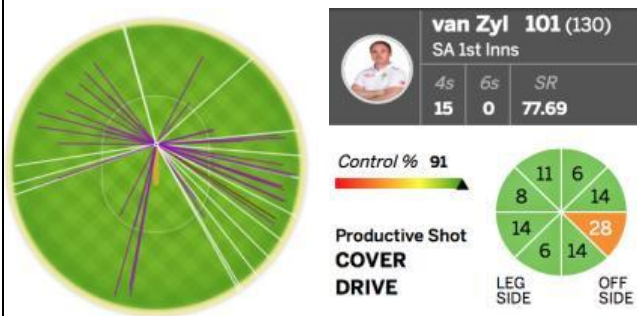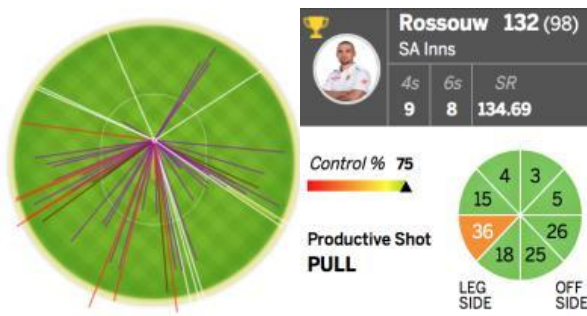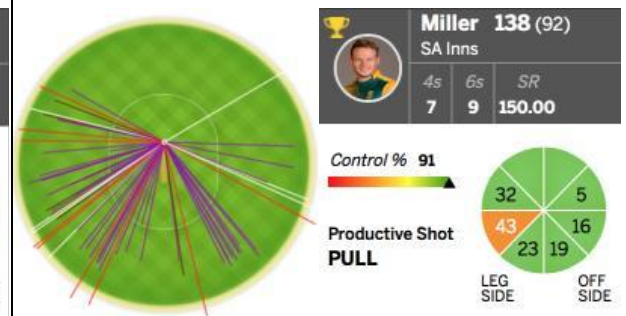



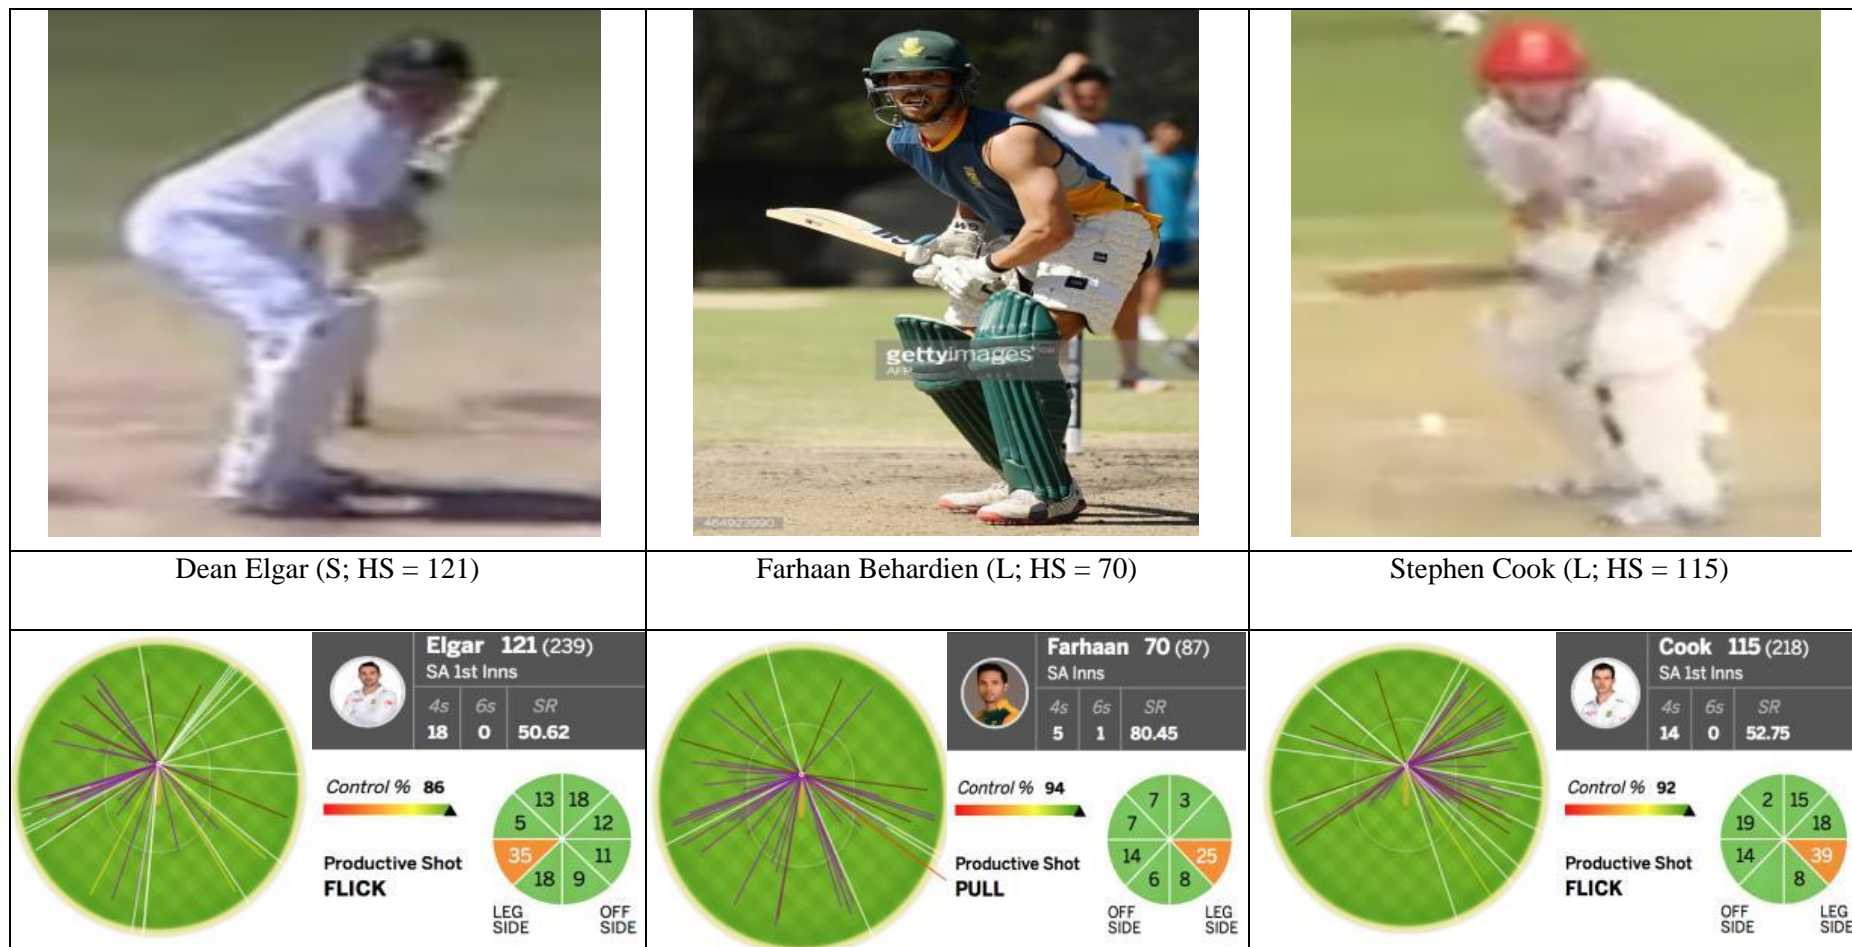

**Supplementary Figure 5.16: South African batsmen's highest score at Test or ODI levels (n = 12)**

*HS = Highest Score in their Test/ODI career; L = Lateral batting backlift technique; S = Straight batting backlift technique; % = percentage; Inns = innings; 1<sup>st</sup> = first; 4s = fours; 6s = sixes; SR = strike rate;*
